# Supplementary material for: Long-Term Outcome of Metal-on-Metal Total Hip Arthroplasty with Modular Neck Stem
Source: MDPI journal article supplement (doi:10.3390/jcm13061525), 2024-03-07

Figure S1: Changes in pseudotumor (PT) positive frequency over time

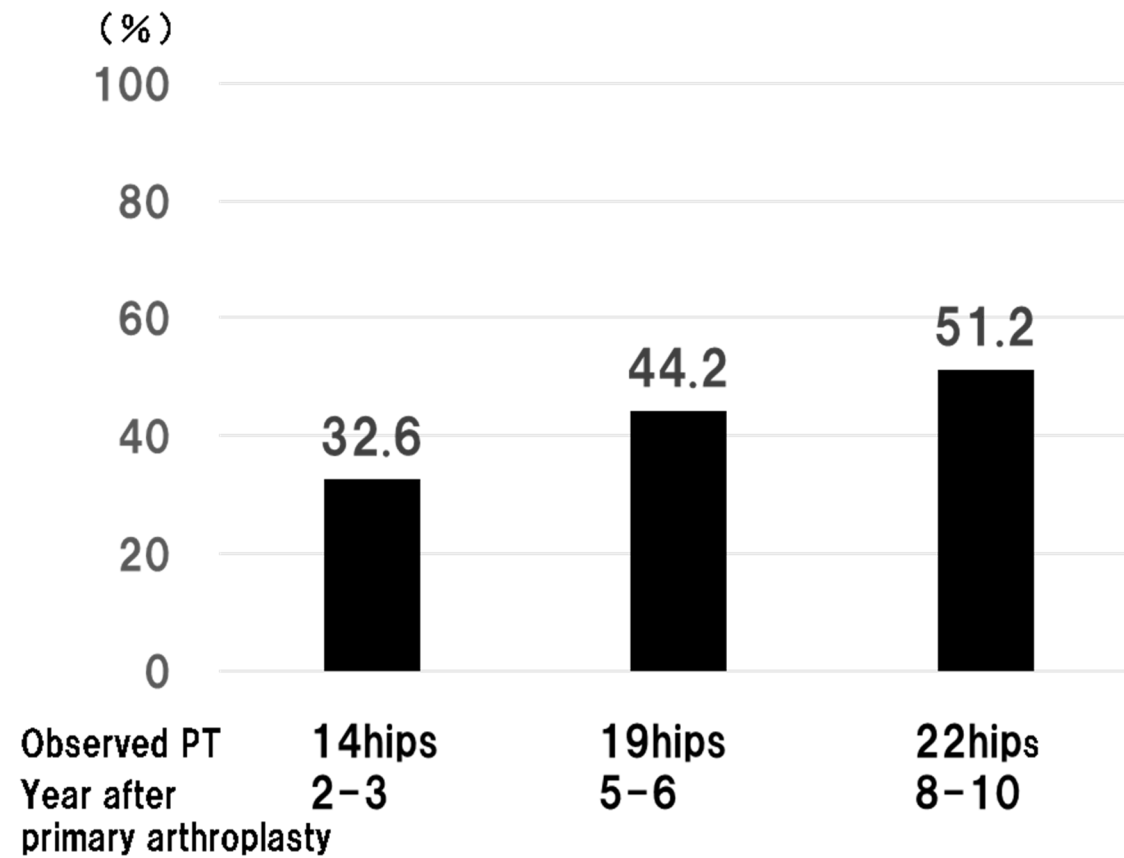

Figure S2: MRI images at first observed PT of revised case3, 5, 6, 7 and 8

Case3

Case5

Case6

Case7

Case8

Axial plane

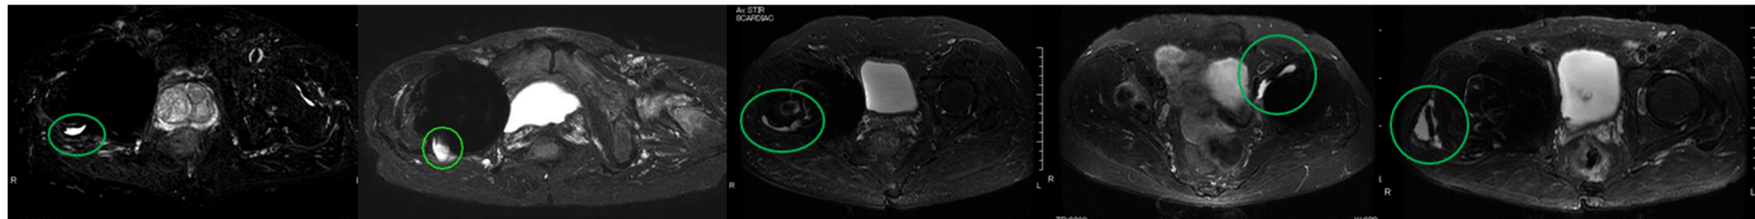

Coronal plane

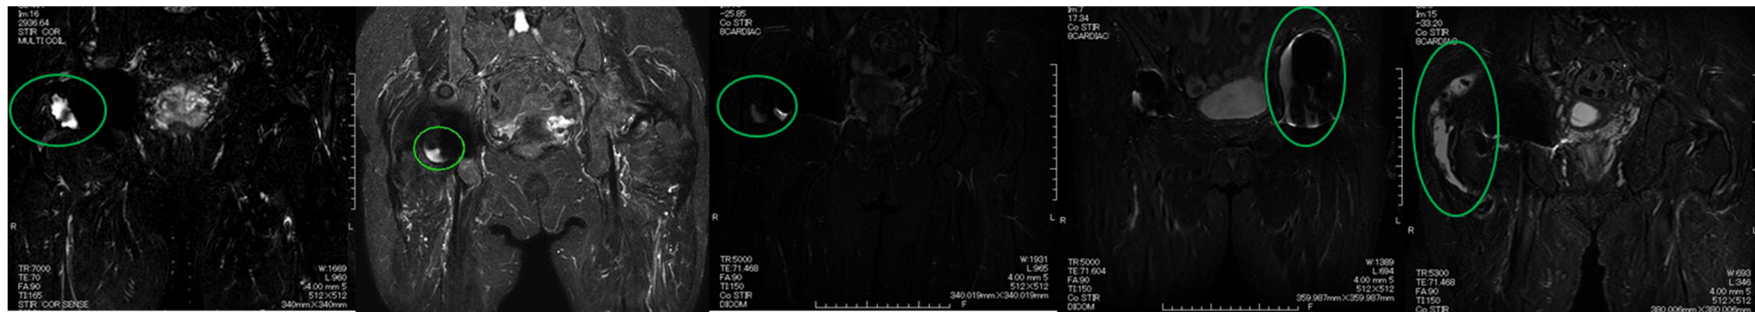

**Figure S3:** Anteroposterior (AP) radiographs of revised cases before and after revised arthroplasty

Case 1      Case2      Case3      Case4      Case5      Case6      Case7      Case8

Implant failure

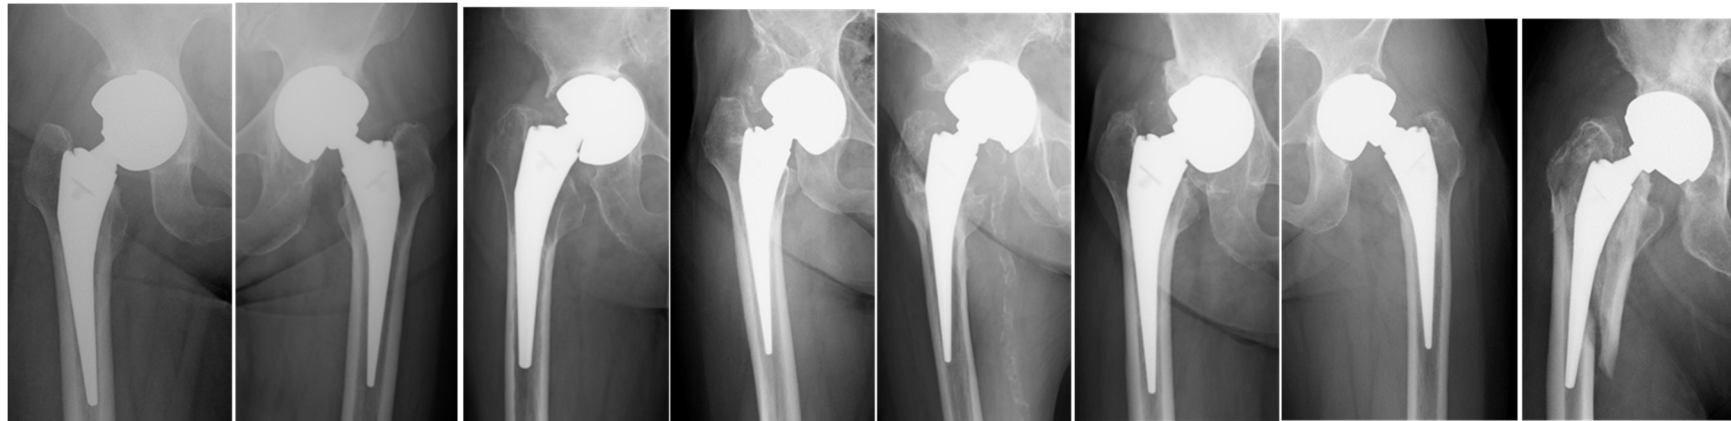

Revised THA

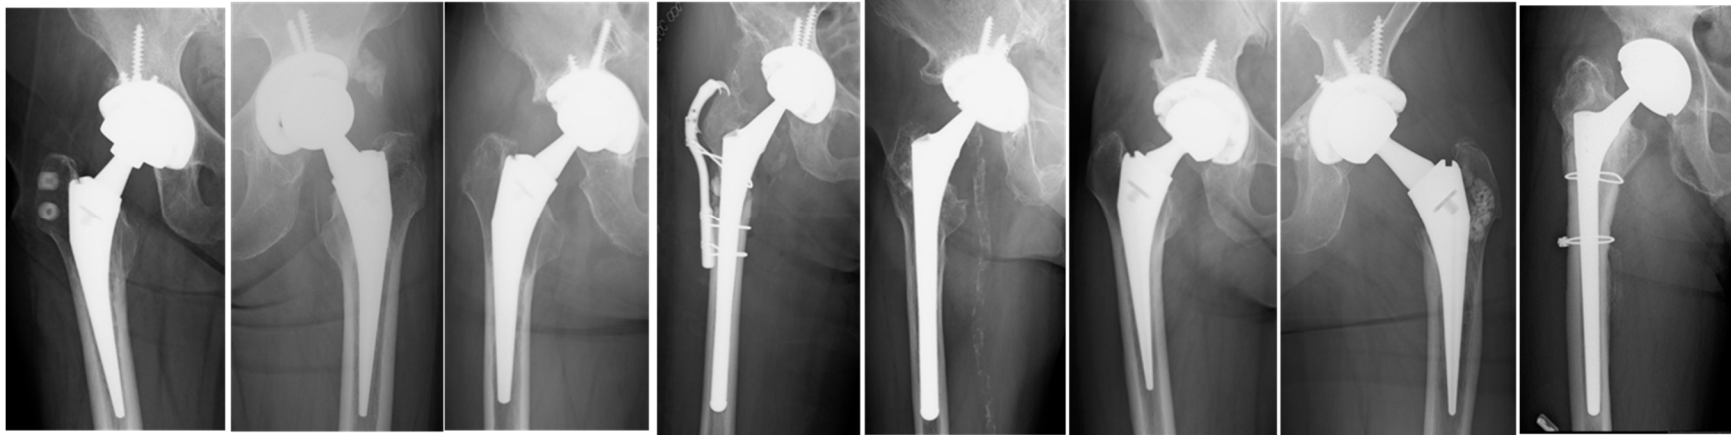

Supplement: s1 [file s1]
